# Supplementary material for: Impact Assessment of Cigarette Smoke Exposure on Organotypic Bronchial Epithelial Tissue Cultures: A Comparison of Mono-Culture and Coculture Model Containing Fibroblasts
Source: PubMed Central journal article supplement — Toxicol Sci. 2015 Jun 16;147(1):207–21. doi: 10.1093/toxsci/kfv122 (PMC4549394; doi:10.1093/toxsci/kfv122), 2015-06-16
Supplement: supp_kfv122_toxsci-15-0235-File011.pdf [file supp_kfv122_toxsci-15-0235-File011.pdf]

## Supplementary Figure 2

### Markers of Epithelial Characteristics

|                          |             | 8% CS        |               |               |               |                |                | 15% CS        |                |                |                |                 |                 |
|--------------------------|-------------|--------------|---------------|---------------|---------------|----------------|----------------|---------------|----------------|----------------|----------------|-----------------|-----------------|
|                          |             | 4 h PE       |               |               | 48 h PE       |                |                | 4 h PE        |                |                | 48 h PE        |                 |                 |
| Gene Name                | Gene Symbol | BR 8% CS 4 h | BRF 8% CS 4 h | sBR 8% CS 4 h | BR 8% CS 48 h | BRF 8% CS 48 h | sBR 8% CS 48 h | BR 15% CS 4 h | BRF 15% CS 4 h | sBR 15% CS 4 h | BR 15% CS 48 h | BRF 15% CS 48 h | sBR 15% CS 48 h |
| E-cadherin               | CDH1        | -0.142       | -0.110        | -0.138        | 0.105         | 0.067          | -0.535         | -0.172        | -0.611         | -0.444         | 0.431 *        | -0.210          | 0.072           |
| $\alpha 1$ (IV) Collagen | COL1A1      | 0.145        | -0.180        | 0.027         | 0.402         | -0.532         | -0.990         | 0.583         | 0.376          | 1.120          | 1.486 *        | 0.276           | -0.183          |
| Desmoplakin              | DSP         | -0.185       | 0.033         | -0.020        | -0.071        | -0.100         | -0.396         | 0.243         | -0.340         | 0.406          | 0.264          | -0.114          | 0.006           |
| Cytokeratin1             | KRT1        | -1.149       | 1.152         | 0.186         | -0.973        | 0.284          | -0.038         | -0.784        | -1.274         | 0.008          | -1.165         | 0.159           | 0.252           |
| Laminin-1                | LAMB1       | -0.140       | 0.086         | -0.319        | 0.650         | -0.377         | -0.517         | 0.352         | 0.559          | 0.905          | 0.961 *        | 0.669           | 1.229 *         |
| MUC1                     | MUC1        | 0.182        | -0.209        | 0.015         | -0.042        | 0.298          | -0.416         | 0.416         | -0.694         | -0.312         | -0.092         | -0.782          | -0.551          |
| Entactin                 | NID1        | 0.272        | -0.276        | 0.478         | -0.288        | 0.107          | -0.685         | 0.336         | 1.025          | 0.532          | 1.017 *        | 0.637 *         | 0.515           |
| Syndecan-1               | SDC1        | -0.188       | 0.183         | 0.012         | 0.604         | 0.424          | 0.667          | 0.154         | -0.706         | 0.336          | 0.676 *        | 0.698           | 1.017 *         |
| ZO-1                     | TJP1        | -0.124       | 0.383         | -0.289        | 0.374         | 0.388          | -0.275         | 0.271         | -0.076         | -0.539         | 0.849 *        | 0.812 *         | 0.846           |

### Markers of Mesenchymal Characteristics

|                            |             | 8% CS        |               |               |               |                |                | 15% CS        |                |                |                |                 |                 |
|----------------------------|-------------|--------------|---------------|---------------|---------------|----------------|----------------|---------------|----------------|----------------|----------------|-----------------|-----------------|
|                            |             | 4 h PE       |               |               | 48 h PE       |                |                | 4 h PE        |                |                | 48 h PE        |                 |                 |
| Gene Name                  | Gene Symbol | BR 8% CS 4 h | BRF 8% CS 4 h | sBR 8% CS 4 h | BR 8% CS 48 h | BRF 8% CS 48 h | sBR 8% CS 48 h | BR 15% CS 4 h | BRF 15% CS 4 h | sBR 15% CS 4 h | BR 15% CS 48 h | BRF 15% CS 48 h | sBR 15% CS 48 h |
| Alpha-SMA                  | ACTA2       | -0.154       | -0.867        | 0.010         | 0.676         | -0.893         | 0.892          | 0.469         | -0.144         | 1.052          | 0.991 *        | 0.357           | 0.394           |
| OB-cadherin                | CDH11       | -0.668       | -0.363        | 0.350         | -0.225        | -1.238         | -0.660         | -0.555        | 0.288          | -1.376         | 0.726 *        | 0.486           | 1.087           |
| N-cadherin                 | CDH2        | -0.407       | -0.455        | 0.118         | -0.349        | -1.361         | -0.497         | -0.861        | -0.092         | -0.163         | -0.092         | -0.609          | -0.861          |
| Beta-catenin               | CTNNB1      | -0.121       | -0.302        | -0.034        | -0.429        | -0.264         | -0.395         | -0.193        | -0.323         | -0.278         | -0.219         | -0.640          | -0.636 *        |
| ETS                        | ETS1        | 0.463        | 0.242         | 0.210         | -0.501        | -0.274         | -1.138         | -0.303        | 0.298          | -0.272         | 1.359 *        | 1.247 *         | 1.295           |
| Fibronectin                | FN1         | -0.830       | 0.278         | 0.071         | -0.683        | -0.713         | -2.518         | -0.365        | -0.503         | 1.920          | 1.048          | 0.897           | -1.019          |
| FOXC2                      | FOXC2       | -0.306       | 0.693         | 0.163         | -0.717        | -1.167         | -0.513         | 0.271         | 0.402          | -0.707         | -1.156 *       | 0.694           | -0.625          |
| Goosecoid                  | GSC         | -0.149       | 0.029         | 0.198         | 0.141         | 0.277          | 0.016          | -0.263        | 0.068          | 0.014          | 0.040          | 0.287           | -0.019          |
| $\alpha 5\beta 1$ integrin | ITGA5       | 0.200        | -0.035        | -0.297        | 0.588         | -0.047         | 0.108          | -0.017        | 0.267          | 0.243          | 1.345 *        | 1.112 *         | 0.979           |
| LEF-1                      | LEF1        | -0.095       | -0.764        | 0.066         | 0.716         | 0.222          | -0.396         | 0.567         | -0.492         | -0.109         | -0.940         | -0.619          | -0.900          |
| FSP-1                      | S100A4      | 0.065        | -0.219        | 0.437         | -0.716        | -0.357         | -0.143         | 0.151         | -0.017         | 0.383          | -0.475         | 0.077           | -0.261          |
| Syndecan-2                 | SDC2        | -0.175       | -0.521        | -0.079        | 0.255         | -1.087         | -0.965         | -0.211        | 0.395          | 1.298          | -0.470         | -0.638          | -0.897          |
| Snail                      | SNAI1       | 1.286        | 0.743         | 0.609         | -0.009        | -0.104         | 0.560          | 1.231         | 1.522          | 0.607          | 1.109 *        | 1.317 *         | 1.268 *         |
| Slug                       | SNAI2       | 0.662        | 0.320         | -0.447        | 0.231         | -0.393         | -0.371         | 0.350         | 0.584          | 0.203          | 0.779 *        | 0.424           | 0.837           |
| Twist                      | TWIST1      | -0.489       | -0.255        | -0.093        | 0.182         | 0.150          | -0.241         | -0.716        | 0.332          | 0.364          | -0.105         | 0.523           | -0.250          |
| Vimentin                   | VIM         | -0.447       | 0.229         | 0.170         | -0.247        | -0.271         | -0.733         | -0.115        | 0.391          | 0.343          | 0.125          | 0.837 *         | -0.474          |

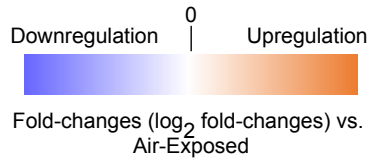

\* FDR  $\leq$  0.05

The differentially expressed genes encoding the epithelial and mesenchymal characteristics were used to explore the manifestation of epithelial mesenchymal transition (EMT). They were selected based on a previous publication of (Kalluri, R., and Weinberg, R. A. (2009). The basics of epithelial-mesenchymal transition. The Journal of Clinical Investigation 119(6), 1420-1428).
