# Supplementary figures and images for: Impact Assessment of Cigarette Smoke Exposure on Organotypic Bronchial Epithelial Tissue Cultures: A Comparison of Mono-Culture and Coculture Model Containing Fibroblasts
Source: PubMed Central journal article supplement — Toxicol Sci. 2015 Jun 16;147(1):207–21. doi: 10.1093/toxsci/kfv122 (PMC4549394; doi:10.1093/toxsci/kfv122), 2015-06-16

Secreted Mediators in the Air-Exposed Tissues

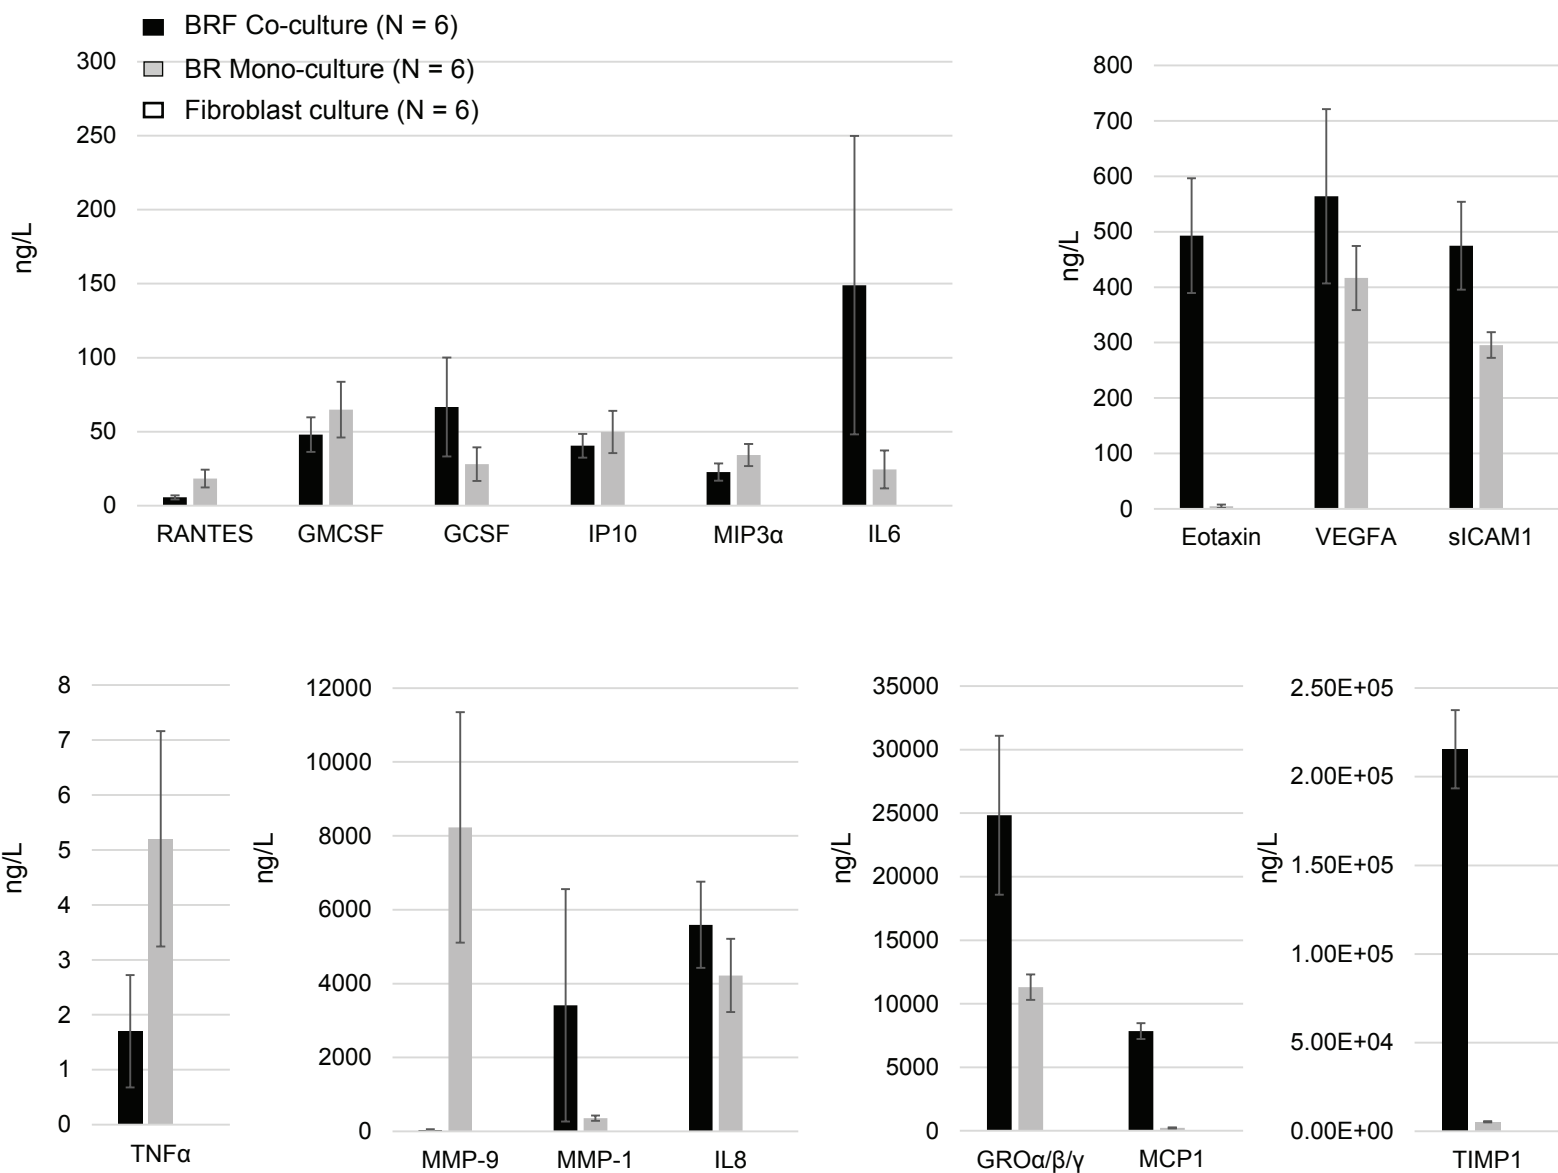

Supplement: supp_kfv122_toxsci-15-0235-File010.pdf [file supp_kfv122_toxsci-15-0235-File010.pdf]
